# Supplementary material for: Leptin-deficient obesity prolongs survival in a murine model of myelodysplastic syndrome
Source: PubMed Central journal article supplement — Haematologica. 2018 Jan 25;103(4):597–606. doi: 10.3324/haematol.2017.181958 (PMC5865427; doi:10.3324/haematol.2017.181958), 2018-04
Supplement: 2017_181958-Disclosures_and_Contributions.pdf [file 2017_181958-Disclosures_and_Contributions.pdf]

Haematologica  
HAEMATOL/2017/181958  
Version 3

Leptin-deficient obesity prolongs survival in a murine model of  
myelodysplastic syndrome

Michael J. Kraakman, Helene L. Kammoun, Dragana Dragoljevic,  
Annas Al-Sharea, Man K.S. Lee, Michelle C. Flynn, Christian J. Stolz,  
Andrew A. Guirguis, Graeme I. Lancaster, Jaye Chin-Dusting, David J.  
Curtis, and Andrew J. Murphy

Disclosures: none

Contributions: MJK and AJM conceived the ideas of the project, conducted experiments, analyzed results and wrote the manuscript. HLK conducted experiments, analyzed results and wrote the manuscript. DD, AAS, MF, ML and CS conducted experiments. SG, LN, contributed reagents. AG conducted experiments and analyzed results. DC and JCD helped conceive the experimental outline and provided reagents. GIL contributed to writing the manuscript. All authors read, edited and agreed upon the final version of this manuscript.
